# Supplementary material for: Nigella sativa L. and COVID-19: A Glance at The Anti-COVID-19 Chemical Constituents, Clinical Trials, Inventions, and Patent Literature
Source: MDPI journal article supplement (doi:10.3390/molecules27092750), 2022-04-25
Supplement: s1 [file s1]

**Table S1: Patent searching results**

| <b>Patent database</b> | <b>Keyword combination</b> | <b>Number of hits</b> |
|------------------------|----------------------------|-----------------------|
| <b>Sci-Finder</b>      | Black cumin + Covid-19     | 1                     |
|                        | Black seed + Covid-19      | 2                     |
|                        | Kalonji + Covid-19         | 1                     |
|                        | Nigella + SARS-CoV-2       | 7                     |
|                        | Nigella + Covid-19         | 6                     |
|                        | Nigellicine + Covid-19     | 0                     |
|                        | Nigellicine + SARS-CoV-2   | 0                     |
|                        | Nigellimine + Covid-19     | 0                     |
|                        | Nigellimine + SARS-CoV-2   | 0                     |
|                        | Sativa + Covid-19          | 20                    |
|                        | Sativa + SARS-CoV-2        | 18                    |
|                        | Thymoquinone + Covid-19    | 4                     |
|                        | Thymoquinone + SARS-CoV-2  | 3                     |
| <b>Espacenet</b>       | Black cumin + Covid-19     | 1                     |
|                        | Black seed + Covid-19      | 5                     |
|                        | Kalonji + Covid-19         | 0                     |
|                        | Nigella + SARS-CoV-2       | 2                     |
|                        | Nigella + Covid-19         | 7                     |
|                        | Nigellicine + Covid-19     | 0                     |
|                        | Nigellicine + SARS-CoV-2   | 0                     |
|                        | Nigellimine + Covid-19     | 0                     |
|                        | Nigellimine + SARS-CoV-2   | 0                     |
|                        | Sativa + Covid-19          | 17                    |
|                        | Sativa + SARS-CoV-2        | 8                     |
|                        | Thymoquinone + Covid-19    | 6                     |

|                    |                           |    |
|--------------------|---------------------------|----|
|                    | Thymoquinone + SARS-CoV-2 | 6  |
| <b>Patentscope</b> | Black cumin + Covid-19    | 1  |
|                    | Black seed + Covid-19     | 6  |
|                    | Kalonji + Covid-19        | 0  |
|                    | Nigella + Covid-19        | 5  |
|                    | Nigellicine + Covid-19    | 0  |
|                    | Nigellicine + SARS-CoV-2  | 0  |
|                    | Nigellimine + Covid-19    | 0  |
|                    | Nigellimine + SARS-CoV-2  | 0  |
|                    | Sativa + Covid-19         | 15 |
|                    | Sativa + SARS-CoV-2       | 10 |
|                    | Thymoquinone + Covid-19   | 3  |
|                    | Thymoquinone + SARS-CoV-2 | 8  |
| <b>USPTO</b>       | Black cumin + Covid-19    | 0  |
|                    | Black seed + Covid-19     | 7  |
|                    | Kalonji + Covid-19        | 0  |
|                    | Nigella + SARS-CoV-2      | 2  |
|                    | Nigella + Covid-19        | 2  |
|                    | Nigellicine + Covid-19    | 0  |
|                    | Nigellicine + SARS-CoV-2  | 0  |
|                    | Nigellimine + Covid-19    | 0  |
|                    | Nigellimine + SARS-CoV-2  | 0  |
|                    | Sativa + Covid-19         | 4  |
|                    | Sativa + SARS-CoV-2       | 3  |
|                    | Thymoquinone + Covid-19   | 2  |
|                    | Thymoquinone + SARS-CoV-2 | 2  |
